# Supplementary material
Source: Springer Nature journal article supplement (https://www.springermedizin.de/resource/supplementary/13075_2012_3566_MOESM5_ESM.pdf/9694816)

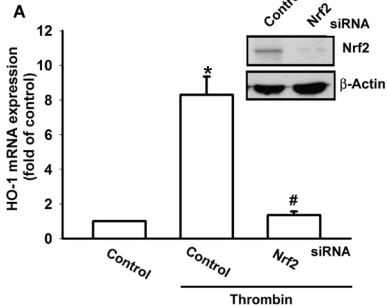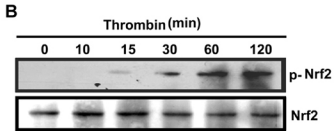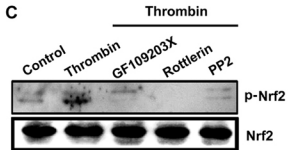

Supplement: MOESM5 [file 9694816]
